1 **Transient dopamine neuron activity precedes and encodes the vigor of**  
2 **contralateral movements**

3

4

5 Marcelo D Mendonça<sup>1,2</sup>, Joaquim Alves da Silva<sup>1,2</sup>, Ledia F. Hernandez<sup>3,4,5</sup>, Ivan Castela<sup>3,4</sup>,  
6 José Obeso<sup>3,4,5</sup>, Rui M Costa<sup>1,2,6\*</sup>

7

8

9 1 - Champalimaud Research, Champalimaud Centre for the Unknown, Lisbon 1400-038

10 2 - NOVA Medical School | Faculdade de Ciências Médicas, Universidade Nova de Lisboa, Lisbon  
11 1169-056, Portugal.

12 3 - HM CINAC (Centro Integral de Neurociencias Abarca Campal). Hospital Universitario HM  
13 Puerta del Sur, HM Hospitales. Madrid, Spain.

14 4 - Center for Networked Biomedical Research on Neurodegenerative Diseases (CIBERNED),  
15 Carlos III Institute of Health, Madrid, Spain.

16 5 - Universidad CEU-San Pablo, Madrid, Spain.

17 6 - Departments of Neuroscience and Neurology, Zuckerman Mind Brain Behavior Institute,  
18 Columbia University, New York, NY 10027, USA.

19

20

21 \*Correspondence can be addressed to RMC [rc3031@columbia.edu](mailto:rc3031@columbia.edu)

## 22 **Highlights**

23

- 24 • Developed a freely-moving task where mice learn rapid individual forelimb sequences.

25

- 26 • Movement-related DANs encode contralateral but not ipsilateral action vigor.

27

- 28 • The activity of reward-related DANs is not lateralized.

29

- 30 • Unilateral dopamine depletion impaired contralateral, but not ipsilateral, movement vigor.

31

32

33

- 34 • **eTOC summary:** Mendonça et al. show that transient activity in movement-related  
35 dopamine neurons in substantia nigra pars compacta encodes contralateral, but not  
36 ipsilateral action vigor. Consistently, unilateral dopamine depletion impaired  
37 contralateral, but not ipsilateral, movement vigor.

38

39 **Summary**

40

41 Dopamine neurons (DANs) in the substantia nigra pars compacta (SNc) have been related to  
42 movement vigor, and loss of these neurons leads to bradykinesia in Parkinson's disease.  
43 However, it remains unclear whether DANs encode a general motivation signal or modulate  
44 movement kinematics. We imaged activity of SNc DANs in mice trained in a novel operant task  
45 which relies on individual forelimb movement sequences. We uncovered that a similar proportion  
46 of SNc DANs increased their activity before ipsi- vs. contralateral forelimb movements. However,  
47 the magnitude of this activity was higher for contralateral actions, and was related to contralateral  
48 but not ipsilateral action vigor. In contrast, the activity of reward-related DANs, largely distinct  
49 from those modulated by movement, was not lateralized. Finally, unilateral dopamine depletion  
50 impaired contralateral, but not ipsilateral, movement vigor. These results indicate that movement-  
51 initiation DANs encode more than a general motivation signal, and invigorate kinematic aspects  
52 of contralateral movements.

53

54 **Keywords:** Dopamine, Movement, Substantia Nigra, Laterality, Vigor, Parkinson's Disease,  
55 Reward.

56

## 57 Introduction

58

59 Choosing which actions to perform in specific contexts is critical for survival. It is also critical  
60 to perform these actions at the right time and with the right potency, i.e. force, speed, duration.  
61 Basal ganglia circuits, and dopaminergic signaling in these circuits, are critical for the modulation  
62 of both movement initiation and movement vigor (Howe et al., 2016; da Silva et al., 2018).  
63 Accordingly, one essential feature of Parkinson's Disease (PD), which is characterized by a  
64 progressive loss of dopaminergic neurons (DANs) in the Substantia Nigra *pars compacta* (SNc)  
65 (Ehringer and Hornykiewicz, 1960), is reduced amplitude (hypokinesia) and slowness of  
66 movements (bradykinesia)

67 Early studies identified that substantia nigra *pars compacta* (SNc) dopaminergic activity was  
68 modulated during large reaching movements (Schultz et al. 1983; Romo and Schultz, 1990). More  
69 recently, the activity of DANs was found to be transiently modulated around movement onset (Jin  
70 and Costa, 2010; Parker et al. 2016; Howe et al. 2016; Collins et al. 2016; Dodson et al. 2016; da  
71 Silva et al. 2018), and manipulations of this activity before movement onset had an impact on the  
72 probability of movement execution and the vigor of movements (Howe et al. 2016; da Silva et al.  
73 2018). This is supported by well-established observations that chronic DA depletion leads to  
74 decreased amplitude, peak force, and speed of movement in PD (Hallett and Khosbin, 1980;  
75 Bologna et al., 2016; Mazonni et al., 2007), and also in rodents (Dowd and Dunnett, 2005;  
76 Palmiter, 2008; Panigrahi et al., 2015). While many studies of vigor and PD have focused on  
77 movement force and speed, the length/duration of movement sequences is also critically affected,  
78 and has been less studied. For example, gait bouts of PD patients are characterized not only by  
79 a lower speed but also by a reduced number of steps per bout (Shah et al., 2020).

80 It has been proposed that DA neurons influence movement vigor by modulating the motivation  
81 to behave (Niv et al., 2007; Berke. 2018). Behavioral studies in PD revealed that the deficit in  
82 movement vigor reflects a reduced probability of committing to more vigorous actions, even when

83 necessary for obtaining a reward (Mazonni et al., 2007). PD motor signs typically start focally on  
84 one side of the body (Monje et al., 2021), contralateral to the most denervated SNc, where  
85 movement vigor deficits are observed (Roggendorf et al., 2012). Similarly, unilateral dopamine  
86 depletion in mice leads to deficits in contraversive, but not ipsiversive movements (Carli et al.,  
87 1985). Striatum is involved in contralateral movements (Schwarcz et al., 1979; Kitama et al., 1991,  
88 Tecuapetla et al., 2016), and DANs activity is higher when animals perform contralateral versus  
89 ipsilateral choices (Parker et al., 2016). Thus, dopaminergic activity is properly placed to affect  
90 movement kinematics in a lateralized way by directly influencing medium spiny neurons (MSNs)  
91 excitability (Lahiri et al., 2020).

92 In this study, we investigate the hypothesis that movement-related DANs signal not only a  
93 general motivation to move, but invigorate specific kinematic aspects of contralateral movements.  
94 Towards this end, we developed a novel behavioral task where freely moving mice have to  
95 perform fast movement sequences using an individual forelimb in order to obtain reward. This  
96 paradigm allowed us to investigate movement sequences performed with either forelimb. We  
97 imaged the activity of genetically identified SNc DA neurons using one-photon imaging during  
98 lever press task performance. We identified distinct populations of SNc DANs with transient  
99 activity related to movement *versus* reward. Although a similar proportion of movement-related  
100 neurons were observed bilaterally, their activity was higher for contralaterally performed  
101 sequences than for ipsilateral ones. Furthermore, this movement-related activity was related to  
102 sequence length but only for contralateral sequences. In contrast, reward-related activity was not  
103 lateralized. Consistently, unilateral lesion of SNc dopaminergic neurons led to contralateral, but  
104 not ipsilateral, forelimb vigor impairment. These results suggest a role of transient dopaminergic  
105 activity before movement in invigorating the duration of contralateral movements.

106

107

108

## 109 **Results**

110

### 111 **Mice learn to perform rapid single-forelimb lever press sequences**

112 We trained mice (n=8) to perform a fast lever-pressing task where it was required to press a  
113 lever at increasingly higher speed in order to obtain a 10% sucrose reward. During the training,  
114 spatial constraints in the lever were imposed in order to restrict the accessibility of the lever to  
115 only one forelimb (Fig 1A, Supplementary Movie 1, Supplementary Movie 2).

116 After introducing the animals to the apparatus and 4 days of continuous reinforcement (CRF,  
117 one press = one reward), animals were trained at a progressively faster fixed-ratio schedule (FR4,  
118 4 presses = one reward), up to a maximum of 4 presses in less than 1 second. During the FR4  
119 training, the lever was progressively receded to guarantee that it was only accessible to one  
120 forelimb (Fig 1A,H, details in the Methods section). Animals were moved across a training  
121 schedule of 19 sessions starting with FR4 in 100 seconds and ending with 5 sessions of FR4 in  
122 1 second. Stability of this asymptotic performance, was tested in 30 consecutive FR4/1sec  
123 sessions.

124

125 With training, the increase in the total number of lever presses (Fig 1B,  $F(3,563, 24,94) =$   
126  $4,514$   $p=0.0086$ ), paired the increase in the number of presses/minute (reaching  $16.76 \pm 12.05$   
127 presses/minute in the last session,  $F(2,443, 17,10) = 4,001$ ,  $p=0.0311$  Supplementary Fig 1A).  
128 During this period, animals rapidly started to organize their behavior in self-paced bouts or  
129 sequences of lever presses (Fig 1C-G) with the percentage of lever presses performed within a  
130 sequence increasing significantly across training ( $F(19,102) = 8.643$ ,  $p<0.001$ ; Fig 1C) until there  
131 were almost no single presses occurring in isolation. In the last training session  $94.13\% \pm 4.50$   
132 of lever presses occurred within a sequence with  $78.85\% \pm 16.13$  of the sequence being  
133 composed by more than one LP (Fig 1C inset).

134 The number of lever presses within a sequence progressively increased ( $F(19,109) = 3.269$ ,  
135  $p < 0.001$ , Fig 1E,G), with the distribution of lever presses per sequence exhibiting a clear peak at  
136 4 lever presses matching the imposed rule ( $3.69 \pm 0.98$ ,  $t_7 = 0.8947$ ,  $p = 0.400$ ). Also, as time  
137 criteria become more demanding, mice decrease their inter-press intervals (IPIs) up to  $0.347 \pm$   
138  $0.276$  s (not significantly different from a target of  $0.333$ ,  $t_7 = 0.1401$ ,  $p = 0.8926$  an IPI  
139 corresponding to the performance of 4 presses in less than 1 second,  $F(19,109) = 2.148$ ,  $p = 0.008$ ,  
140 Fig 1I). Consistent with the reduction in the IPI, mice also increased their mean lever press velocity  
141 with training (Fig 1K). There was also a progressive reduction of the variability of the IPIs (Fano  
142 Factor, Fig 1J,  $F(49,308) = 1.118$ ,  $p = 0.2840$ , post-hoc test for linear trend:  $F(1,308) = 18.73$ ,  
143  $p < 0.0001$ ).

144 After the 19 sessions of training, animals were assessed in 30 additional sessions with the  
145 criteria of 4 LPs in less than one second, after behavior had asymptote, with no substantial  
146 differences noted across these sessions in behavior metrics (Fig 1, Supplementary Fig 1,  
147 Supplementary Table 1).

148 These data indicate that animals learned to shape their behavior to get closer to the target  
149 criteria and, after learning, this performance is stable across time. Additionally, animals can be  
150 trained to use individual forelimbs (Supplementary Fig 2), allowing us to test ipsi and  
151 contralaterally performed movement sequences.

152

### 153 **Transient activity of SNc dopaminergic neurons precedes movement sequence** 154 **initiation**

155 In order to investigate the activity of SNc DANs during the execution of contralateral vs  
156 ipsilateral movements we chronically-implanted gradient index (GRIN) lenses above the SNc, and  
157 injected a genetically encoded calcium indicator (GCaMP6f) into genetically-identified  
158 dopaminergic SNc cells (DAT-Cre), and imaged the activity using a one-photon miniaturized  
159 epifluorescence microscope (Ghosh et al., 2011), (Fig 2a-b). Half of the animals (total  $n = 6$  mice)

160 had a virus injection and lens implanted in the left hemisphere and the other half in the right one.  
161 We trained these animals in the same task as described above, but with 2 independent sessions  
162 each day, where they had to use a separate forelimb (Fig 2D). Each day mice were placed in a  
163 box with a lever available on one of the sides (left or right). The session ended after the animal  
164 obtained 30 rewards or 30 minutes have passed. After the first session, the animals were removed  
165 from this box, and placed in their homecage for a period of 30 to 150 minutes before being trained  
166 in a second session in the box, but with the other lever available. The order of limb trained (left or  
167 right) was pseudo-randomized across days. Mice were able to perform movement sequences  
168 with both forelimbs and, after training, no significant differences in behavioral metrics were noted  
169 between the two forelimbs (data summarized in Supplementary Fig 3, Supplementary Table 2,  
170 and presented as ipsilateral and contralateral forelimb to the implanted lens). Neural activity was  
171 assessed during the phase of asymptotic performance.

172 Constrained non-negative matrix factorization for endoscope data (CNMF-E) (Zhou et al.,  
173 2018) was used to extract activity traces for individual neurons from the microscope video (6 mice,  
174 101 neurons; Fig 2B-C). Neuronal spatial footprints and temporal activity were extracted from  
175 conjoined left and right sessions. Then, for all subsequent analysis, a normalized version (z-score)  
176 of the scaled, non-denoised version of  $dF$  extracted by CNMF-E, was performed for each of the  
177 two full sessions (left and right) independently. We created peri-event time histograms using the  
178 normalized fluorescence for first press in any lever press sequence and reward consumption for  
179 each experimental condition (ipsilateral or contralateral forelimb performance).

180 In line with previous results (da Silva et al., 2018), we found a population of SNc dopaminergic  
181 neurons significantly modulated before movement sequence initiation (~37%) with a small overlap  
182 with the population of SNc neurons modulated around reward (~37%) (Fig 2E,F, Supplementary  
183 Fig. 4). Some DANs also started their modulation during sequence execution, but this number  
184 was lower than those modulated before sequence performance (Only 2-12% of neurons  
185 modulated during performance,  $F(1,10)=28.82$ ,  $p<0.001$ ; Supplementary Fig 5A).



186 Movement-initiation neurons displayed transient increase in activity before both contralateral  
187 and ipsilateral forelimb movement sequences (Fig 2G,H Supplementary Fig 5B). However,  
188 although a similar proportion of movement-initiation neurons was active before contra and  
189 ipsilateral movements ( $p=0.8021$ , paired t-test, Fig 2I), the magnitude of the activity of these  
190 neurons was significantly higher in the contralateral vs. ipsilateral SNc ( $p<0.001$ , unpaired t-test,  
191 Fig 2J). This difference in neural activity could not be explained by a difference in the performance  
192 of the task as no performance differences were identified between ipsi and contralateral forelimb  
193 (Supplementary Fig. 3, Supplementary Table 2).

194 These data show that although movement-initiation neurons were found bilaterally, activity  
195 preceding contralateral limb movements is higher than the activity preceding ipsilateral  
196 movements.

197

### 198 **DANs encode the vigor of upcoming contralateral, but not ipsilateral, forelimb movements.**

199 We next investigated the relation between the magnitude of the dopamine transients before  
200 movement initiation and the vigor of the sequences. We started by dividing the performed  
201 sequences into short and long movement bouts (based on the mean sequence duration). The  
202 magnitude of the activity of movement-modulated DANs was significantly higher before longer  
203 movement sequences than before shorter ones when movements were performed with the  
204 contralateral limb (Fig 3A left,  $n=37$  neurons, paired t-test  $t=4.493$ ,  $df=36$ ,  $p<0.0001$ ) but not when  
205 performed with the ipsilateral one (Fig 3A right,  $n=33$  neurons, paired t-test  $t=0.7195$ ,  $df=32$ ,  
206  $p=0.4771$ ). This supported the hypothesis that transient SNc activity encode contralateral vigor.

207 Even accounting for some day-to-day variability in the field of view, *in vivo* calcium imaging  
208 permits us to track the same region of interest (ROI) across multiple sessions. This approach  
209 allows us to explore if SNc neurons' activity is functionally stable across different performance  
210 sessions of highly-trained movements (supporting the argument of a functional identity of specific  
211 dopaminergic neurons during task performance in a context of diversity of functions – Fig 2F). To

212 match neurons across sessions, we used a nearest neighbor approach. For all sessions, a  
213 centroid for each ROI was calculated. For each reference centroid, distance from all centroids on  
214 the image to be compared was calculated, and the 3 ROIs with the smallest distance were visually  
215 inspected for their shape to confirm the matching. Pairing was iteratively performed across the 3  
216 included sessions. We extracted 114 ROIs that were matched in at least 2 sessions (40 ROIs –  
217 35.09% - were matched across the 3 sessions, Fig 3B)

218 Event-aligned activity of matched neurons was correlated across daily sessions and the  
219 results were averaged if matched more than 2 sessions (matched group). The activity of the same  
220 neuron was correlated with non-matched neurons from the same animal and averaged across  
221 daily sessions (shuffled group). This approach revealed that there is a high correlation of event-  
222 aligned activity of spatially mapped neurons (66.7% of neurons had a strong correlation – above  
223 0.5, Fig 3B, Fig 3C) and this similarity was significantly higher than correlations with non-spatially  
224 mapped ones (0.677 +- 0.049 vs. 0.149 +- 0.014, paired t-test performed in the Fisher's Z  
225 transformed correlation coefficient  $t=14.66$ ,  $df=113$ ,  $p<0.0001$ , Fig 3D). This analysis suggests  
226 that, in general, SNc dopaminergic neurons functional identity remains stable across days while  
227 animals perform the learned task.

228 Matching across days (as performed in Fig 3B) allowed us to study the activity of similar  
229 neurons across sessions (Fig 3E) and classify them as vigor-modulated or not. Vigor modulated  
230 neurons represented around 22% of contralateral action initiation neurons (Fig 3F). When trials  
231 from 3 sessions were considered, activity of movement-initiation neurons was related with  
232 contralateral vigor (Fig 3G left,  $n=37$  neurons, paired t-test,  $t=2.310$ ,  $df=36$ ,  $p=0.027$ ), a result that  
233 was not present ipsilaterally (Fig 3G right,  $n=33$  neurons, paired t-test,  $t=1.120$ ,  $df=32$ ,  $p=0.239$ ).

234 These data show that activity in movement-initiation SNc neurons code the vigor of  
235 contralateral (in comparison to ipsilateral) performed movement sequences, and their neural  
236 identity keeps stable over time.

237

## 238 **Reward-related dopamine activity is not lateralized**

239 Modulation around reward was identifiable when mice performed the task either in the ipsi  
240 and contralateral conditions (Fig 4A,B). The number of neurons was not significantly different  
241 between conditions (Fig 4C, 36.9%  $\pm$  5.9 vs. 41.1  $\pm$  14.1, paired t-test:  $p=0.8003$ , Fig 4D). The  
242 number of reward-modulated neurons (active only after reward consumption) was similar when  
243 the action leading to that reward was performed ipsi or contralaterally ( $\sim 23\%$ , Fig 4F middle,  
244 paired t-test:  $p=0.9235$ ) and no difference was observed in the maximum fluorescence of neurons  
245 according to the side of performed action (0.94  $\pm$  0.09 vs. 1.02  $\pm$  0.07 Fig 4F right, t-test:  
246  $p=0.4760$ ). The overlap between reward-modulated neurons and movement initiation neurons  
247 was residual ( $\sim 2.5\%$  of the total) and significantly lower than the one we would expect by random  
248 allocation (Supplementary Fig 6), revealing that movement initiation and reward neurons mostly  
249 represent two distinct populations.

250 A second group of neurons was already active before reward consumption and ramped up as  
251 animals approached the magazine (Fig 4D, bottom, hereafter called magazine-approach  
252 neurons) (Howe et al., 2013). Based on the box design, approach to the magazine could be  
253 performed with either an ipsi or a contraversive movement (Fig 4E). While the number of  
254 magazine-approach neurons was not significantly different during ipsi or contraversive  
255 movements ( $\sim 15\%$ , paired t-test:  $p=0.8308$ ) their activity was significantly higher during  
256 contraversive movements (1.51  $\pm$  0.19 vs. 0.66  $\pm$  0.19 Fig 4G right, t-test:  $p=0.0035$ ).

257 These data support that movement initiation and reward modulated neurons in the SNc are  
258 not likely the same DAN population and neurons responsive to reward consumption do not have  
259 a lateralized representation.

260

## 261 **Dopaminergic depletion reduces the vigor of contralaterally performed forelimb movement** 262 **sequences**

263 The results shown above suggest that SNc dopaminergic activity is asymmetric during single  
264 forelimb movements, and that its' magnitude is related to the vigor of contra but not ipsilateral  
265 sequences. We therefore tested if unilateral loss of dopaminergic neurons in SNc would  
266 preferentially affect the vigor of contralateral sequences. To achieve that, we used unilateral  
267 striatal injection of 6-hydroxydopamine (6-OHDA), a neurotoxin that selectively affects  
268 dopaminergic neurons. It causes rapid degeneration of striatal terminals (within hours after  
269 treatment) and changes in SNc DANs markers and cell body structure and numbers are  
270 detectable already 3 days after lesion (Stott et al., 2014).

271 A new group of 14 mice was trained in the task as described in Fig 2D until they reached an  
272 asymptotic stage (FR4/1 second). After this, using a stereotaxic approach, injection of 2  $\mu$ L of 6-  
273 OHDA (n=8) or saline (n=6) was performed in dorsolateral striatum in a randomly chosen side  
274 (left or right). Post-operative care was performed during the following 7 days and mice did not  
275 have access to the operant boxes. After this time period, mice were again placed in the operant  
276 boxes and had to perform the task to obtain reward using the same criteria as before treatment  
277 (FR4/1 second) (Fig 5A, B).

278 Unilateral dopamine depletion led to a reduction in the number of presses per sequence (2  
279 Way repeated-measures ANOVA, Time  $F(1,7)=68.90$ ,  $p<0.001$ , Forelimb  $F(1,7)=4.704$ ,  
280  $p=0.0667$ , Time x Forelimb  $F(1,7)=11.11$ ,  $p=0.0125$ , Fig 5C left) and corresponding reduction in  
281 the percentage of long/high vigor sequences (2 Way repeated-measures ANOVA, Time  
282  $F(1,7)=30.12$ ,  $p<0.001$ , Forelimb  $F(1,7)=2.087$ ,  $p=0.1918$ , Time x Forelimb  $F(1,7)=32.45$ ,  $p<0.001$   
283 Fig 5E left). Whereas the contralateral limb to the lesion started to perform smaller sequences  
284 (4.12  $\pm$  0.20 to 2.17  $\pm$  0.14, Fig 5C left, Multiple comparison after 2-way repeated-measures  
285 ANOVA,  $p<0.001$ ) and show a reduced number of long/high vigor sequences (48.82%  $\pm$  7.72 to  
286 8.13%  $\pm$  3.48, Fig 5E left, Multiple comparison after 2-way repeated-measures ANOVA,  $p<0.001$ )  
287 this was not observed for the limb ipsilateral to the lesion (4.13  $\pm$  0.34 to 3.52  $\pm$  0.39, Fig 5C left,  
288 Multiple comparison after 2-way repeated-measures ANOVA,  $p=0.138$  and 41.34%  $\pm$  5.16 to

289 37.67% +- 5.67, Fig 5E left, Multiple comparison after 2-way repeated-measures ANOVA,  
290  $p=0.9725$ ). Regardless of the unilateral dopamine depletion mice kept performing the task with  
291 the intended limb (Sup Fig. 7).

292 The relative mean sequence length (after treatment/before treatment) was significantly  
293 different between sides (Fig 5C right, paired t-test,  $t=3,759$ ,  $df=7$   $p=0.007$ ) and significantly  
294 different from the unit value (representing no change) only contralaterally (Fig 5C right, one  
295 sample t-test,  $t=11.07$ ,  $df=7$ ,  $p<0.001$ ). This result was confirmed by the significant difference in  
296 the relative proportion of long sequences between sides (Fig 5E right, paired t-test,  $t=4,126$ ,  $df=7$   
297  $p=0.004$ , significance from the unit value only identified contralaterally, Fig 5E right, one sample  
298 t-test,  $t=15.46$ ,  $df=7$ ,  $p<0.001$ )

299 By contrast, injection of saline only led to a small, and non-side specific reduction in the  
300 average number of presses/sequence (Fig 5D left, 2 Way repeated-measures ANOVA, Time  
301  $F(1,5)=7.704$ ,  $p=0.039$ , Side  $F(1,5)=2.007$ ,  $p=0.216$ , Time x Side  $F(1,5)=0.010$ ,  $p=0.923$ ) without  
302 a significant change in the proportion of long sequences (Fig 5F left, 2 Way repeated-measures  
303 ANOVA, Time  $F(1,5)=4.911$ ,  $p=0.078$ , Side  $F(1,5)=0.8281$ ,  $p=0.405$ , Time x Side  $F(1,5)=0.003$ ,  
304  $p=0.957$ ). When the relative mean sequence length was compared between sides no difference  
305 was found (Fig 5D right, paired t-test,  $t=0.44$ ,  $df=5$ ,  $p=0.6755$ ), similar to the lack of a difference  
306 in sequence length change (Fig 5F right, paired t-test,  $t=0.5099$ ,  $df=5$   $p=0.6319$ ),

307 Overall, these data show that unilateral dopamine depletion leads to a reduction in the length  
308 of contralaterally performed movement sequences, without impacting the vigor or performance of  
309 ipsilateral movements.

310

## 311 **Discussion**

312

313 We found that activity in a subset of SNc dopaminergic neurons encodes the vigor of  
314 contralateral actions before movement initiation. Using a novel lateralized task, we unraveled that

315 transient SNc dopaminergic activity precedes the execution of forelimb movement sequences  
316 irrespective of the limb performing the sequence. However, this signal was only related to the  
317 movement vigor of contralateral (but not ipsilateral) sequences. Also, striatal dopamine depletion  
318 disrupted the vigor of contralateral, but not ipsilateral, movement sequences. By contrast,  
319 responses of reward-related SNc neurons were bilateral and modulated irrespectively of the side  
320 of the preceding action.

321 Laterality is a major topic in nervous system organization, and most attention on nigro-striatal  
322 pathway has been placed on the dopaminergic striatal terminals. Although in freely moving  
323 animals, striatal dopamine transients are synchronized across hemispheres (Fox et al., 2016),  
324 contralateral action response was identified in DA terminals in dorsal striatum (Parker, et al.,  
325 2016). SNc neurons have both ipsilateral and contralateral functionally relevant projections  
326 (Jaeger et al., 1983), but those ipsilateral to SNc cell bodies are anatomically overrepresented  
327 (Poulin et al., 2018). Our data suggest that activity in DANs cell bodies is lateralized, and hence  
328 the higher activity in striatal DA terminals observed before contralateral movements are not solely  
329 explained by more arborization of SNc neurons to ipsilateral striatum, or enhanced terminal  
330 modulation of DA release. Furthermore, and given that dopamine depletion starts asymmetrically  
331 by the caudal putamen in PD (Morrish et al., 1996; Monje et al., 2021), these findings have  
332 implications for understanding the asymmetry in movement vigor observed in PD (Djaldeti et al.,  
333 2006; Mazonni et al., 2007).

334 It has been previously shown that dopamine and its' metabolite 3,4-dihydroxyphenylacetic  
335 acid (DOPAC) increase bilaterally in the striatum in relation to speed when rodents ran straight,  
336 but contralaterally when they performed circling movements (Freed et al., 1985). This is in line  
337 with the asymmetry in SNc neuronal activation we observed, and suggests that asymmetric tonic  
338 levels of dopamine in dorsal striatum regulate movement vigor (Schultz, 2002). Furthermore, our  
339 results suggest that transient changes in SNc dopamine preceding movement onset, in addition  
340 to tonic activity, modulate kinematic aspects of contralateral movements.

341 Although evidence of laterality is present in movement responses, the same is not true for  
342 reward responses. This activity was similar irrespective of the side of the performed action that  
343 led to it and started only after reward collection. The lack of laterality of reward responses was  
344 also noted in a fiber photometry study in ventral striatum where headfixed mice had to perform an  
345 ipsi or contralateral movement in response to a visual stimulus (Moss et al., 2020). This suggests  
346 that responses to unpredicted reward represent a more general teaching signal in the brain, and  
347 not solely related to the action performed to obtain the reward.

348 Although efforts have been made to unify observations of movement and reward responses  
349 in DANs, under classic RPE model, some studies suggest that movement signals are modulated  
350 distinctly from RPE (Lee et al., 2019). The results presented here also suggest that movement  
351 signals and reward-related signals can be independently modulated. If movement-related signals  
352 would reflect learned action value, we would not expect a difference in magnitude of activity based  
353 on which limb was used to perform the actions - as reward prediction is similar for both left and  
354 right limb performance of action sequences. Furthermore, we would not expect that magazine-  
355 approach activity (Howe et al., 2013) would be higher for contraversive than ipsiversive  
356 movements, as again these actions have the same expected value. These observations do not  
357 argue that dopamine neurons do not encode an RPE, just that not all dopamine neurons  
358 necessarily encode an RPE. Facing the high dimensionality of an organism behavior, error signals  
359 could be differently decomposed according to the condition (Diuk et al., 2013) or different state  
360 information may be carried by dissociable parallel circuits (Takahashi et al., 2016; Lau et al.,  
361 2017). However, they substantiate the existence of a population of SNc DA neurons directly  
362 involved in movement and movement invigoration.

363 The findings here deserve further expansion regarding some aspect of PD etiopathogenesis.  
364 First, the involvement of distinct SNc populations in movement initiation vs. reward is in keeping  
365 with the notion of selective vulnerability of nigrostriatal degeneration and the origin of motor versus  
366 neuropsychiatric manifestations such as depression, anxiety or apathy (Weintraub et al., 2015).

367 Second, the finding that SNc activity is directly linked with the execution and vigor of a learned  
368 movement sequence implicates that, contrary to classic understanding (DeLong et al., 1983), the  
369 nigrostriatal dopaminergic system may continue to be activated and engaged during the  
370 performance of routine, automatic actions. Such neurons in the ventrolateral SNc are the first and  
371 most affected in PD and accordingly, the findings here agree with the hypothesis of high metabolic  
372 demand and overuse as critical vulnerability factor underlying the onset of neurodegeneration  
373 (Hernandez et al, TINS, 2019). Thus, clarifying if there is a link between genetic heterogeneity  
374 and functional phenotypes in these dopaminergic neurons could provide valuable resources to  
375 better understand the spectrum of clinical manifestations in PD and, more importantly, to define  
376 the origin of selective neuronal dopaminergic degeneration in PD.

377

378

379

380

381

382

383

384

385



## 386 **Acknowledgements**

387

388 We thank Ana Vaz and Catarina Carvalho for mouse colony management, Thomas Akam and  
389 H elio Rodrigues for help in behavioral box development and implementation, and the  
390 Champalimaud Hardware Platform (Filipe Carvalho, Artur Silva and D ario Bento) for support in  
391 the development of the behavioral hardware setup. We thank Cristina Alc acer and Nuno Loureiro  
392 for their contributions during the 6-OHDA experiments. This work was supported by Funda  o  
393 para a Ci encia e Tecnologia (FCT) through a doctoral fellowship (SFRH/BD/119623/2016 to  
394 MDM) and Funda  o Luso-Americana para o Desenvolvimento (FLAD) by a visiting student  
395 fellowship (2018/31 to MDM); by a doctoral fellowship from the Gulbenkian Foundation (to JAdS),  
396 by a Marie Curie Fellowship (MSCA-IF-RI 2016; to LFH), by a predoctoral grant by Spanish  
397 Ministry of Innovation and Science (BES-2016-077493 to IC), by ERA-NET, ERC (COG 617142),  
398 HHMI (IEC 55007415), National Institute of Health (5U19NS104649), and the Simons-Emory  
399 International Consortium on Motor Control to RMC. Further support was obtained from the  
400 research infrastructure Congento, co-funded by Lisboa2020 and FCT (LISBOA-01-0145-FEDER-  
401 022170).

402

### 403 Author Contributions

404 MDM, JAdS and RMC designed experiments and conceptualized analysis. MDM, JAdS and LFH  
405 performed behavioral experiments. MDM, LFH and IC performed calcium imaging experiments.  
406 MDM performed analysis with contribution from JAdS. MDM wrote the original draft with JAdS  
407 and RMC which was critically reviewed by the other authors. RMC and JO supervised the work.

408

409

410 **Methods:**

411

412 **Experimental Model and Subject Details**

413 All experiments were approved by the Portuguese Direcção Geral de Veterinária and  
414 Champalimaud Centre for the Unknown Ethical Committee and performed in accordance with  
415 European Union Directive for Protection of Vertebrates Used for Experimental and other Scientific  
416 Ends (86/609/CEE and Law No. 0421/000/000/2014). Male C57BL/6J mice were tested between  
417 2 and 4 months old. For calcium imaging studies, the male DAT-IRES:Cre (Dopamine  
418 Transporter-Internal Ribosome Entry Site-linked Cre recombinase gene) mouse line from  
419 Jackson Labs Stock 006660 (The Jackson Laboratory; B6.SJL-Slc6a3tm1.1(Cre)Bkmn/J) was  
420 used. These mice have Cre recombinase expression directed to dopaminergic neurons, without  
421 disrupting endogenous dopamine transporter expression. Genotype was confirmed by  
422 polymerase chain reaction (PCR) amplification. Sample sizes are detailed in the Results and/or  
423 figure legends.

424

425 **Virus injections and lens placement.**

426 Mice were kept in deep anaesthesia using a mixture of isoflurane and oxygen (1-3% isoflurane  
427 at 1l/min) and the procedure was conducted in aseptic conditions.

428 The mouse head was stabilized in the stereotaxic apparatus (Kofl), a skin incision was  
429 performed to expose the skull, connective and muscle tissue was carefully removed and the skull  
430 surface was leveled at less than 0.05mm by comparing the height of bregma and lambda, and  
431 also in medial-lateral directions. Unilateral virus injection was performed using a glass pipette with  
432 GCaMP6f stock viral solution (AAV2/5.SYN.FlexGCaMP6fWPRE.SV40 - University of  
433 Pennsylvania). For imaging, 1 ul of virus solution was injected in the right (n=3) of the left (n=3)  
434 substantia nigra compacta at the following coordinates: -3.16 mm anteroposterior, 1.40mm lateral  
435 from bregma and 4.20 deep from the brain surface. The injection was done using a Nanojet II or

436 Nanojet III (Drummond Scientific) with a rate of injection of 4.6 nl every 5s. After the injection was  
437 finished, the pipette was left in place for 10-15 minutes. The virus solution was kept at -80 °C and  
438 thawed at room temperature just before the injection.

439 A 500-um diameter, 8.2-mm long gradient index (GRIN) lens (GLP-0584, Inscopix) was  
440 implanted at the same coordinates as the injection. Before the lens was lowered, a blunt 28 G  
441 needle was lowered to 3 mm deep from the brain surface to facilitate the lowering of the GRIN  
442 lens. The GRIN lens was then lowered (4.2 mm deep). The lens was fixed in place using  
443 cyanoacrilate, quick adhesive cement (C&B Metabond) and black dental cement (Ortho-Jet).  
444 Three weeks after surgery, the mouse was anaesthetized and fixed with head bars. A baseplate  
445 (BPC-2, Inscopix) attached to a mini epifluorescence microscope (nVista HD, Inscopix) was  
446 positioned above the GRIN lens. To correctly position the baseplate, brain tissue was imaged  
447 through the lens to find the appropriate focal plane using 40% LED power, a frame rate of 10 Hz  
448 and a digital gain of 4. Once the focal plane was set, the baseplate was cemented to the rest of  
449 the cap using the same dental cement. Imaging started 2–3 days after this final step.

450

#### 451 **Single-limb fast FR4 operant task.**

452 Animals were trained using 14x16 cm custom-built operant chambers placed inside sound  
453 attenuating boxes. PyControl, (<https://pycontrol.readthedocs.io>), a behavioral experiment control  
454 system built around the Micropython microcontroller, was used to control and detect events and  
455 supply rewards. The custom-built boxes had in their design a retractable lever.

456 At the beginning of each session there was the onset of a light, and the animals were required  
457 to perform a sequence of presses at a minimum frequency in order to obtain a sucrose reward.  
458 Sucrose solution (10%) was delivered through the opening of a solenoid (LHDA1231515H, Lee  
459 Company). Sucrose solution was delivered through a tube into the magazine (5µl per reward).  
460 Licks were detected using an infrared beam and through a side camera, mouse position in the  
461 box was monitored through a camera placed on the top of the box.

462 Mice were placed on food restriction throughout training, and fed daily after the training  
463 sessions with approximately 1.5 - 2.5g of regular food to allow them to maintain a body weight of  
464 around 85% of their baseline weight. To facilitate learning, animals were initially exposed to one  
465 session of magazine training where sucrose would be available on a random time schedule, and  
466 to three to four sessions of continuous reinforcement schedule (CRF) before training, where single  
467 lever presses would be reinforced. In the following sessions animals were reinforced if they  
468 performed a sequence of 4 consecutive presses (Fixed Ratio 4, FR4) in a particular time window  
469 (FR4/Xs, fixed-ratio four within X seconds). The duration of time required to perform the four  
470 lever presses was reduced across sessions from 100 seconds to 20 s, 8 s, 4 s, 2 s and finally 1s.  
471 To shape animals to use only one of the forelimbs the lever was progressively retracted and the  
472 slit through which the forelimb accessed the lever was reduced with a custom-built piece.

473 In the imaging group, animals performed the task 2 times/session - one with the lever in the  
474 left side of the box and the other with the lever in the right - that were randomized throughout the  
475 training. Task ended after 30 minutes on each side or when the animals obtained 30 rewards.

476 The lever was equipped with a digital 9-axis inertial sensor with a sampling rate of 200 Hz  
477 (MPU-9150, Invensense) assembled on a custom-made PCB and connected to a computer via a  
478 custom-made USB interface PCB (Champalimaud Foundation Hardware Platform). Lever velocity  
479 was extracted from this sensor.

480 Timestamps from the behavioral task were synchronized with calcium imaging data using TTL  
481 pulses sent from the behavioral chambers to the Inscopix data acquisition system via a BNC  
482 cable.

483

#### 484 **GCaMP6f imaging using a mini-epifluorescence microscope**

485 Mice were briefly anaesthetized using a mixture of isoflurane and oxygen (1% isoflurane at  
486 1L/min) and the mini-epifluorescence microscope was attached to the baseplate. This was  
487 followed by a period of 15-20 min of recovery in the home cage before starting the experiments.

488 Fluorescence images were acquired at 10 Hz and the LED power was set 40-60% with a gain of  
489 4. Image acquisition parameters were always set to the same parameters between sessions to  
490 be able to compare the activity recorded. Six GCaMP6f-expressing DAT-Cre mice were imaged  
491 during the FR4/1s task in 3-5 consecutive days.

492

### 493 **Calcium image processing and analysis.**

#### 494 *GCaMP6f image processing*

495 All fluorescence movies were initially processed using the Mosaic Software (v. 1.2.0,  
496 Inscopix). Two different movies were collected on the same day (one for ipsi and one for  
497 contralateral forelimb). As the epifluorescence microscope was not removed during this period,  
498 movies were concatenated for the next analysis step. First, all frames were spatially binned by a  
499 factor of 4. To correct the movie for translational movements and rotations, frames were  
500 registered to a reference image consisting of an average of the raw fluorescence movie.

501

#### 502 *Extraction of calcium signals*

503 We implemented the ‘constrained non-negative matrix factorization for endoscopic data’  
504 (CNMF-E) framework for our calcium imaging analysis. This framework is an adaptation of the  
505 CNMF algorithm that can reliably deal with the large fluctuating background from multiple sources  
506 in the data, and enable accurate source extraction of cellular signals. It include four steps: 1)  
507 initialize spatial and temporal components of single neurons without the direct estimation of the  
508 background, 2) estimate the background given the estimated spatiotemporal activity of the  
509 neurons; 3) update the spatial and temporal components of all neurons while fixing the estimated  
510 background fluctuation, 4) iteratively repeat step 2 and 3.

511 CNMF-E only identifies regions of interest that are active in the condition.

512 After analysis, data from the videos were separated in ipsi and contralateral videos. Further  
513 calcium imaging analyses were performed on standardized scores (z-score) of each session.

514

515 *Criteria to identify lever-press-related and reward-related DANs using GCaMP6f imaging.*

516 We constructed a PETH for each neuron trace spanning from -8 to 6 s from lever press onset  
517 for the first press and for the first lick after reward. Distributions of the PETH from -8 to -3 s before  
518 the event were considered baseline activity. We then searched each PETH during a determined  
519 epoch for bins that were significantly different from the baseline. A significant change in  
520 fluorescence was defined as at least two consecutive bins with fluorescence higher than a  
521 threshold of 99% above the baseline. For first-press modulated neurons, a window from -2 to 0 s  
522 was used. For rewarded lick modulated neurons a window from 0 to 1 s was used.

523 For each neuron, maximum activity in specific time-windows was calculated by the maximum  
524 of a moving average of 3 bins. The time window was -2 to 0 for lever press, 0 to 1 for neurons  
525 modulated after reward and -1 to 0 for neurons modulated before reward.

526

527 *Cell pairing across sessions*

528 Analysis of matched cells between different days/sessions was based on a nearest neighbors  
529 method. For all sessions, a centroid for each ROI was calculated. For each reference centroid,  
530 distance from all centroids on the image to be compared was calculated, and the 3 ROIs with the  
531 smallest distance were visually inspected for their shape to define a match. Alignments were  
532 performed to 4 events: First lever press and Reward in the ipsi and contralateral situations. The  
533 calcium-signal from -10 to +6 seconds after the event was used to calculate the correlation  
534 coefficients for individual ROIs across days in the 4 conditions. If the neuron was matched in the  
535 3 days, the 3 possible correlation coefficients were calculated and averaged. Then the maximum  
536 value was extracted. As a control, we correlated each ROI with all ROIs in the field of view (FOV)  
537 of the same animal on the comparison day. The maximum value was extracted and then averaged  
538 across units. Correlation values were transformed for each point using Fisher's Z statistic, then  
539 the samples were averaged, and back-transformed into a weighted correlation.

540

541 *PETH correlation across sessions.*

542 For each ROI, 4 PETHs were built as previously described: For the ipsilateral and contralateral  
543 conditions 2 events were considered (lever press and rewarded licks). For each ROI pair the  
544 correlation between these 4 events was performed. The one with the maximum correlation was  
545 identified and this value extracted. This process was repeated when matching occurred across  
546 the 3 sessions, and average value between the 3 matchings (A and B, A and C and B and C) was  
547 computed. These are the values for matched ROIs in figure 3B.

548 As a control, we ran the same analysis, but instead of using the matched ROI we used all  
549 ROIs from the same animal, in a different session. We then calculated the average of the  
550 maximum correlations as previously described.

551

552 *Sequence length analysis*

553 Movement sequences were divided into short and long sequences by the mean number of  
554 presses/sequence of each animal. For each movement sequence, maximum fluorescence in the  
555 period -2 to 0 seconds before the first lever press was calculated as previously described.

556 A neuron was classified as vigor related if it's activity in longer sequences was significantly  
557 different ( $p < 0.05$ , unpaired t-test) from the activity in shorter sequences.

558

559 **Striatal injection of 6-OHDA or Saline and post-operative care**

560 As in virus injections, mice were kept in deep anaesthesia using a mixture of isoflurane and  
561 oxygen (1-3% isoflurane at 1l/min) and the procedure was conducted in aseptic conditions.

562 The mouse head was stabilized in the stereotaxic apparatus (Kofit), a skin incision was  
563 performed to expose the skull, connective and muscle tissue were carefully removed and the skull  
564 surface was leveled at less than 0.05mm by comparing the height of bregma and lambda, and  
565 also in medial-lateral directions. 6-Hydroxydopamine hydrochloride (Sigma Aldrich AB, Sweden)

566 was dissolved at a fixed concentration of 3.2 µg/µl free-base in 0.02% ice-cold ascorbic acid/saline  
567 and used within 2 h. Injection of 2 ul of 6-OHDA or saline was performed in the dorsolateral  
568 striatum +0.5 mm anteroposterior and ±2.5 mm lateral from bregma and 3.0 mm deep from brain  
569 surface. Injection was done through a glass pipette using a Nanojet II with a rate of injection of  
570 4.6 nl every 5s. After the injection was finished, the pipette was left in place for 10-15 minutes.

571 After surgery, food restriction was reduced (with each animal having access to up 4 mg of  
572 food pellets/day). Mice that showed weight loss were hand-fed (i.e. they were presented with the  
573 food while being held by the hands of the investigator) and DietGel Boost was placed in their  
574 boxed up to 4 days after surgery. In order to avoid competition for the food, weaker mice were  
575 placed in cages other than those containing unimpaired mice. The postoperative survival rate was  
576 100%.

577

#### 578 *Sequence length analysis*

579 Movement sequences were divided into short and long sequences according to mean number  
580 of presses/sequence before striatal injection of 6-OHDA or Saline.

581

#### 582 **Anatomical verification**

583 Animals were euthanized after completion of the behavioural tests. First animals were  
584 anaesthetized with isoflurane, followed by intraperitoneal injection of ketamine-xylazine (5 mg/kg  
585 xylazine; 100 mg/kg ketamine). Animals were then perfused with 1% phosphate buffered saline  
586 (PBS) and 4% paraformaldehyde and brains were extracted for histological processing. Brains  
587 were kept in 4% paraformaldehyde overnight and then transferred to 1x PBS solution. Brains  
588 were sectioned coronally in 50-um slices (using a Leica vibratome VT1000S) and kept in PBS  
589 before mounting or immunostaining.

590 Images were taken using a wide-field fluorescence microscope (Zeiss Axiolmager).

591



592        **Quantification and statistical analysis**

593        Data is presented as mean  $\pm$  standard error of mean (SEM) and statistical significance was  
594 considered for  $p < 0.05$ . Statistical analysis was conducted using GraphPad Prism 8 (GraphPad  
595 Software Inc., CA) and MATLAB statistical toolbox (The MathWorks Inc, MA). One-way or two-  
596 way ANOVAs were used to investigate main effects, and Bonferroni-corrected post-hoc  
597 comparisons performed whenever appropriate. Paired or unpaired t-tests were used for planned  
598 comparisons. Details for statistical tests are presented in supplementary Table S1. Statistical  
599 methods were not used to pre-determine sample size

600 **Key Resources Table**

601

| Reagent or Resource                                  | Source                                             | Identifier                                                                                                  |
|------------------------------------------------------|----------------------------------------------------|-------------------------------------------------------------------------------------------------------------|
| <b>Bacterial and Virus strains</b>                   |                                                    |                                                                                                             |
| AAV5.SYN.FlexGCaMP6fWPRE.SV40                        | UPENN                                              | AV-5-PV2822                                                                                                 |
| <b>Chemicals, Peptides, and Recombinant Proteins</b> |                                                    |                                                                                                             |
| Sucrose                                              | Sigma-Aldrich                                      | Cat# 84099                                                                                                  |
| 6-Hydroxydopamine hydrobromide                       | Sigma-Aldrich                                      | Cat# H116                                                                                                   |
| <b>Experimental Models: Organisms/Strains</b>        |                                                    |                                                                                                             |
| Mouse: Slc6a3 <sup>tm1(cre)Xz/J</sup> (DAT-Cre)      | Jackson<br>Laboratories                            | 020080                                                                                                      |
| Mouse: C57BL6                                        | Champalimaud<br>Centre Vivarium                    | N/A                                                                                                         |
| <b>Software and Algorithms</b>                       |                                                    |                                                                                                             |
| CNMF-e                                               | Klaus et al, 2017;<br>Pnevmatikakis et<br>al, 2016 | N/A                                                                                                         |
| Bonsai-Open Ephys                                    | Lopes et al, 2015                                  | <a href="https://open-ephys.org/bonsai">https://open-ephys.org/bonsai</a>                                   |
| pyControl                                            | pyControl<br>developers                            | <a href="https://pycontrol.readthedocs.io">https://pycontrol.readthedocs.io</a>                             |
| Matlab 2016b, Matlab 2018b                           | MathWorks                                          | <a href="https://www.mathworks.com/products/matlab.html">https://www.mathworks.com/products/matlab.html</a> |

602

603

604

605

606

607 **Figure Legends**

608

609 **Figure 1: A novel task for assessment rapid single-forelimb lever press sequences.**

610 **A)** Schematics of the training schedule. Training starts with a first session of Magazine Training  
611 (MT) followed by 4 sessions of continuous reinforcement schedule (CRF) where each press leads  
612 to one reward. After a training period of 19 days of FR4 of increasing time constraint (from 4  
613 presses in 100 seconds up to 1 second) and progressive lever retraction to lead to single forelimb  
614 lever press (LP). Animals were moved to a performance phase during 30 days, where 4 lever  
615 presses performed in less than one second led to a reward. **B)** With training, the total number of  
616 Lever Presses increased and **C)** animals rapidly started to organize their behavior in self-paced  
617 bouts or sequences of lever presses, until there were almost no single presses occurring. **D)** In  
618 the performance stage about 60% of sequences were rewarded as animals reorganize their  
619 behaviour **G)** and start to perform lever press sequences of 4-5 presses **E)**.  
620 **F)** Example of sequences performed by a representative animal, aligned at the time of sequence  
621 initiation. Individual lever presses are marked as black ticks, the full sequence duration is shaded  
622 in grey and the IPIs that meet the session minimum target are shaded in blue. **H)** Representative  
623 frames collected from a high-speed (120 fps) camera during sequence performance. **I)** With  
624 training mice decrease the Inter-press interval to a mean of 0.347 seconds. The reorganization of  
625 IPIs distribution (*Inset*) happens during training. **J)** Variability of the inter-press interval decreases  
626 while press velocity increases across training **K)**.

627 (Error bar denotes S.E.M.) \* $p < 0.05$ ; \*\* $p < 0.01$ ; \*\*\* $p < 0.001$ ; \*\*\*\*  $p < 0.0001$ . For detailed statistical  
628 analysis, see Table S1.

629

630 **Figure 2: SNc dopaminergic neurons are transiently active before movement sequence**

631 **initiation. A)** In 6 DAT-IRES:Cre mice, a miniature epifluorescence microscope was used for  
632 deep-brain calcium imaging from SNc dopaminergic neurons during task performance. **B)** Field

633 of view (projection of pixel standard deviation) of a DAT-Cre mouse expressing GCaMP6f in the  
634 SNpc. Regions of interest (ROIs) correspond to traces in C. **C)** Example traces obtained using  
635 the CNMF-E algorithm during the FR4 task. ROIs #1 and #5 are examples of units modulated  
636 before first lever press - gray lines - and ROIs #2 and #4 are examples of units modulated after  
637 reward - red lines. **D)** Schematics of the training schedule used for this set of experiments. Mice  
638 were trained in a pseudo-randomized order across different training days alternating between  
639 starting with the ipsi- or the contralateral forelimb. **E)** Activity of all recorded ROIs from one session  
640 aligned to the first contralateral lever press (left) and to the beginning of reward consumption  
641 (right). **F)** Venn diagram representing contralateral first press and reward-related neurons. **G)**  
642 PETH of positively modulated neurons for first press and reward (bottom) and corresponding heat  
643 maps (top). **H)** Venn diagram representing first press modulated neurons when action was  
644 performed by contralateral (blue, same number as in E) and ipsilateral (red) forelimb. **I)** PETH of  
645 positively modulated neurons for first press contralateral (blue) and ipsilateral (red) (bottom) and  
646 corresponding heat map for ipsilateral neurons (top). **J)** Percentage of positively modulated  
647 neurons before first lever press per mouse, comparing contralateral and ipsilateral forelimb (NS,  
648  $p = 0.57$ , paired t-test). **K)** Maximum fluorescence before first lever press of positively modulated  
649 neurons when the action was performed with the contralateral and ipsilateral forelimb  
650 (Contralateral,  $n=37$  neurons, Ipsilateral,  $n=33$  neurons,  $*** p<0.001$ , unpaired t-test). Data are  
651 presented as mean  $\pm$  SEM.  $*p<0.05$ ;  $**p<0.01$ ;  $***p<0.001$ ;  $**** p<0.0001$ . For detailed statistical  
652 analysis, see Table S1.

653  
654 **Figure 3: Transient SNc activity before the first lever press encodes the vigor of**  
655 **contralateral movement sequences.** **A)** Sequences were classified as short and long  
656 sequences based on mean value for each animal. Maximum fluorescence before first lever press  
657 of the movement neurons described in figure 2 in long and short sequences performed by  
658 contralateral (left panel,  $n=37$ ,  $p<0.001$ ) and ipsilateral forelimb (right,  $n=33$ ,  $p=0.9297$ ). **B)**

659 Matching of ROIs identified across 3 sessions of performance. Only ROIs that were matched in  
660 at least 2 of 3 sessions were plotted (left). Heatplot showing the average cross-days correlation  
661 of matched neurons PETHs and maximum cross-days correlation of each ROI with all ROIs of  
662 the same animal across days as a control (right). **C)** Example PETHs of 3 ROIs in different  
663 sessions disclosing the similarities in average neural activity. **D)** Histogram of the cross-days  
664 correlations represented in panel C). (n=114 ROIs \*\*\* p<0.001, paired t-test). **E)** Example of a  
665 contralateral movement-modulated ROI identified across the 3 sessions. PETHs divided by longer  
666 sequences (dark blue) and shorter sequences (light blue). Insets with the maximum activity before  
667 movement initiation for all long (dark blue) and short (light blue) sequences performed in that  
668 session. Right: Maximum activity before movement initiation in all trials of the 3 sessions  
669 (p<0.001, unpaired t-test). This strategy was used to identify vigor modulated neurons in panel  
670 F). **F)** Vigor modulated neurons: Positively-modulated 13.51% in the contralateral, 6.06% in the  
671 ipsilateral (p=0.1960; Fisher exact test); Negatively-modulated: 8.10% in the contralateral, 3.03%  
672 in the ipsilateral. **G)** Maximum fluorescence before first lever press of neurons identified in Fig 2  
673 and panel A) accounting for trials in the 3 sessions. Left: Contralateral; Right: Ipsilateral. \*p<0.05;  
674 \*\*p<0.01; \*\*\*p<0.001; \*\*\*\* p<0.0001. For detailed statistical analysis, see Table S1.

675  
676 **Figure 4: Activity of reward-modulated neurons is not lateralized** **A)** Heat maps of neurons  
677 with responses around reward when animals performed the task with the ipsilateral and  
678 contralateral forelimb. **B)** Venn diagram representing these neurons when reward is collected  
679 after performing a contraversive (yellow) and ipsiversive (blue, same number as in 2F) movement.  
680 **C)** Percentage of positively modulated neurons in the contra- and ipsiversive conditions (p = 0.80,  
681 paired t-test). Data are presented as mean ± SEM. **D)** Example of the 2 types of responses  
682 identified around reward: reward-modulated neurons (top) and magazine approach neurons  
683 (bottom). Left - Activity heatmap per trial; Right - PETH of that neuron. **E)** Top view of mouse  
684 position when pressing the lever and consuming reward in situations where it performs a

685 contraversive (top) and ipsiversive (bottom) movement. **F)** Activity of reward modulated neurons  
686 after a contraversive (blue) or ipsiversive (red) movement: PETH of reward modulated neurons  
687 (left), percentage of modulated neurons per mouse (n=6, 25.88% +- 15.40 vs. 22.80% +- 8.84,  
688 p=0.8902, paired t-test) and Maximum fluorescence after reward consumption (right) (Ipsiversive,  
689 n=27 neurons, Contraversive, n=19 neurons, p=0.4860, unpaired t-test). **G)** Activity of magazine-  
690 approach neurons after a contraversive (blue) or ipsiversive (red) movement: PETH of magazine-  
691 approach neurons (left), percentage of modulated neurons per mouse (n=6, 15.20% +- 5.85 vs.  
692 14.14% +- 4.47, p=0.9125, paired t-test) and Maximum fluorescence (right) (Ipsiversive, n=12  
693 neurons, Contraversive, n=22 neurons, \*\*p=0.0035, unpaired t-test).

694  
695 **Figure 5: Dopamine depletion disrupts contralateral vigor. A)** A new group of mice (n=14)  
696 was trained in the task performing actions with each forepaw. After a plateau performance was  
697 reached, mice were injected with 6-OHDA or saline unilaterally in the striatum and retested after  
698 the lesion. **B)** Example of performance with contra- and ipsilateral forelimbs to the lesion side,  
699 before (black) and after (purple) treatment of a mouse injected with 6-OHDA (top) and saline  
700 (bottom). Intra-striatal treatment with 6-OHDA leads to a redistribution of number of  
701 presses/sequence performed on the contralateral forelimb with the performance of sequences.  
702 **C)** Change in the number of presses/sequence for 6-OHDA treated animals. Left) Number of  
703 presses/sequence across the 4 conditions (Time: Before/After and Forelimb: Contra/Ipsilateral)  
704 for 6-OHDA treated animals. There was an effect for Time and an interaction between Forelimb  
705 and Time conditions. 2 Way repeated-measures ANOVA, Time  $F(1,7)=68.90$ ,  $p<0.001$ , Forelimb  
706  $F(1,7)=4.704$ ,  $p=0.0667$ , Time x Forelimb  $F(1,7)=11.11$ ,  $p=0.0125$ . Post-hoc tests revealed a  
707 significant difference in the before/after condition in the contralateral forelimb (4.12 +- 0.20 to 2.17  
708 +-0.14, multiple comparison test after 2-way repeated-measures ANOVA,  $t(7)=6.835$ ,  $p<0.001$ )  
709 but not ipsilaterally (4.13 +- 0.34 to 3.52 +-0.39, multiple comparison test after 2-way repeated-  
710 measures ANOVA,  $t(7)=2.121$ ,  $p=0.1380$ ). Right) Ratio of presses/sequence after treatment,

711 normalized to the one before treatment for both ipsi- and contralateral forelimbs. There was a  
712 significant difference between ipsi and contralateral change (paired t-test,  $t(7)=3.759$ ,  $p=0.0071$ )  
713  $N=8$ . While contralaterally the change was significantly different from the unit value (one sample  
714 t-test vs. 1:  $t(7)=11.07$ ,  $p<0.0001$ ), ipsilaterally no significant difference was found (one sample t-  
715 test vs. 1:  $t(7)=2.281$ ,  $p=0.0565$ ). **D)** Change in the number of presses/sequence for saline treated  
716 animals. Left) Number of presses/sequence across the 4 conditions (Time: Before/After and  
717 Forelimb: Contra/Ipsilateral) for saline treated animals. There was only small effect for Time. 2  
718 Way repeated-measures ANOVA, Time:  $F(1,5)=7.704$ ,  $p=0.0391$ , Forelimb:  $F(1,5)=2.007$ ,  
719  $p=0.2157$ , Time x Forelimb:  $F(1,5)=0.01041$ ,  $p=0.9227$ . There was not any significant change in  
720 the number of presses/sequence after saline treatment either contralaterally (3.40 +- 0.35 to 2.73  
721 +- 0.33, multiple comparison test after 2-way repeated-measures ANOVA,  $t(5)=1.408$ ,  $p=0.3885$ )  
722 or ipsilaterally (3.06 +- 0.31 to 2.46 +- 0.45, multiple comparison test after 2-way repeated-  
723 measures ANOVA,  $t(5)=1.264$ ,  $p=0.4552$ ). Right) Ratio of presses/sequence after treatment,  
724 normalized to the one before treatment for both ipsi- and contralateral forelimbs. There wasn't  
725 any significant difference between ipsi and contralateral change (paired t-test,  $t(5)=0.4441$ ,  
726  $p=0.6755$ ). **E)** Change in the percentage of Long Sequences/All Sequences for 6-OHDA treated  
727 animals. Long Sequences are defined as sequences with a number of presses higher than the  
728 mean number of presses on baseline condition for each forelimb (i.e. the number calculated in  
729 panels C and D). Left) Percentage of Long Sequences/All Sequence across the 4 conditions  
730 (Time: Before/After and Forelimb: Contra/Ipsilateral) for 6-OHDA treated animals. There was an  
731 effect for Time and an interaction between Forelimb and Time conditions. 2 Way repeated-  
732 measures ANOVA, Time  $F(1,7)=30.12$ ,  $p<0.001$ , Forelimb  $F(1,7)=2.087$ ,  $p=0.1918$ , Time x  
733 Forelimb  $F(1,7)=32.45$ ,  $p<0.001$ . Post-hoc tests revealed a significant difference in the  
734 before/after condition in the contralateral forelimb (48.82% +- 7.72 to 8.13% +- 3.48,  $t(7)=8.854$ ,  
735  $p<0.001$ ) but not on ipsilateral forelimbs (41.34% +- 5.16 to 37.67% +- 5.67,  $t(7)=0.799$ ,  
736  $p=0.9725$ ). Right) Ratio of long sequences after treatment, normalized to the one before treatment

737 for ipsi- and contralateral forelimbs. There was a significant difference between ipsi and  
738 contralateral change (paired t-test,  $t(7)=4.126$ ,  $p=0.0044$ ). While contralaterally the change was  
739 significantly different from the unit value (one sample t-test vs. 1:  $t(7)=15.46$ ,  $p<0.0001$ ),  
740 ipsilaterally no significant difference was found (one sample t-test vs. 1:  $t(7)=0.210$ ,  $p=0.8397$ ). **F**  
741 Change in the percentage of Long Sequences/All Sequences for saline treated animals. Left)  
742 Percentage of Long Sequences/All Sequence across the 4 conditions (Time: Before/After and  
743 Forelimb: Contra/Ipsilateral) for saline treated animals. There were no significant changes with  
744 saline treatment (2 Way repeated-measures ANOVA, Time  $F(1,5)=4.911$ ,  $p=0.078$ , Side  
745  $F(1,5)=0.8281$ ,  $p=0.405$ , Time x Side  $F(1,5)=0.003$ ,  $p=0.957$ ; Contralateral: 45.87% +- 7.11 to  
746 30.40% +- 14.40; Ipsilateral: 37.35% +- 4.72 to 20.69% +- 8.20). Right) Ratio of long sequences  
747 after treatment, normalized to the one before treatment for ipsi- and contralateral forelimbs. There  
748 wasn't any significant difference between ipsi and contralateral change (paired t-test,  $t(5)=0.5099$ ,  
749  $p=0.6319$ ). Data are presented as mean  $\pm$  SEM. \* $p<0.05$ ; \*\* $p<0.01$ ; \*\*\* $p<0.001$ ; \*\*\*\*  $p<0.0001$ . For  
750 detailed statistical analysis, see Table S1.

751

752

753

754

755



756 **References:**

757

758 Andén NE, Dahlström A, Fuxe K, Larsson K. Functional role of the nigro-neostriatal dopamine  
759 neurons. *Acta Pharmacol Toxicol (Copenh)*. 1966;24(2):263-274.

760 Berke JD. What does dopamine mean?. *Nat Neurosci*. 2018;21(6):787-793.

761 Birkmayer W, Hornykiewicz O. [The L-3,4-dioxyphenylalanine (DOPA)-effect in Parkinson-  
762 akinesia]. *Wien Klin Wochenschr*. 1961 Nov 10;73:787-8.

763 Bologna M, Leodori G, Stirpe P, Paparella G, Colella D, Belvisi D, Fasano A, Fabbrini G,  
764 Berardelli A. Bradykinesia in early and advanced Parkinson's disease. *J Neurol Sci*. 2016 Oct  
765 15;369:286-291.

766 Carli M, Evenden JL, Robbins TW. Depletion of unilateral striatal dopamine impairs initiation of  
767 contralateral actions and not sensory attention. *Nature*. 1985 Feb 21-27;313(6004):679-82.

768 Collins AL, Greenfield VY, Bye JK, Linker KE, Wang AS, Wassum KM. Dynamic mesolimbic  
769 dopamine signaling during action sequence learning and expectation violation. *Sci Rep*. 2016 Feb  
770 12;6:20231.

771 Costall B, Naylor RJ, Pycock C. Non-specific supersensitivity of striatal dopamine receptors  
772 after 6-hydroxydopamine lesion of the nigrostriatal pathway. *Eur J Pharmacol*. 1976;35(2):276-  
773 283.

774 da Silva JA, Tecuapetla F, Paixão V, Costa RM. Dopamine neuron activity before action  
775 initiation gates and invigorates future movements. *Nature*. 2018;554(7691):244-248.

776 DeLong MR, Crutcher MD, Georgopoulos AP. Relations between movement and single cell  
777 discharge in the substantia nigra of the behaving monkey. *J Neurosci*. 1983 Aug;3(8):1599-606.

778 Djaldetti R, Ziv I, Melamed E. The mystery of motor asymmetry in Parkinson's disease. *Lancet*  
779 *Neurol*. 2006;5(9):796-802.

780 Diuk C, Tsai K, Wallis J, Botvinick M, Niv Y. Hierarchical learning induces two simultaneous,  
781 but separable, prediction errors in human basal ganglia. *J Neurosci*. 2013;33(13):5797-5805.

782 Dodson PD, Dreyer JK, Jennings KA, Syed EC, Wade-Martins R, Cragg SJ, Bolam JP, Magill  
783 PJ. Representation of spontaneous movement by dopaminergic neurons is cell-type selective and  
784 disrupted in parkinsonism. *Proc Natl Acad Sci U S A*. 2016 Apr 12;113(15):E2180-8.

785 Dowd E, Dunnett SB. Comparison of 6-hydroxydopamine-induced medial forebrain bundle and  
786 nigrostriatal terminal lesions in a lateralised nose-poking task in rats. *Behav Brain Res*. 2005 Apr  
787 15;159(1):153-61.

788 Ehringer H, Hornykiewicz O. [Distribution of noradrenaline and dopamine (3-hydroxytyramine)  
789 in the human brain and their behavior in diseases of the extrapyramidal system]. *Klin*  
790 *Wochenschr*. 1960 Dec 15;38:1236-9

791 Fox ME, Mikhailova MA, Bass CE, et al. Cross-hemispheric dopamine projections have  
792 functional significance. *Proc Natl Acad Sci U S A*. 2016;113(25):6985-6990

793 Freed CR, Yamamoto BK. Regional brain dopamine metabolism: a marker for the speed,  
794 direction, and posture of moving animals. *Science*. 1985;229(4708):62-65.

795 Grace AA, Bunney BS. The control of firing pattern in nigral dopamine neurons: single spike  
796 firing. *J Neurosci*. 1984;4(11):2866-2876.

797 Ghosh KK, Burns LD, Cocker ED, Nimmerjahn A, Ziv Y, Gamal AE, Schnitzer MJ. Miniaturized  
798 integration of a fluorescence microscope. *Nat Methods*. 2011 Sep 11;8(10):871-8.

799 Hallett M, Khoshbin S. A physiological mechanism of bradykinesia. *Brain*. 1980 Jun;103(2):301-  
800 14.

801 Hernandez LF, Obeso I, Costa RM, Redgrave P, Obeso JA. Dopaminergic Vulnerability in  
802 Parkinson Disease: The Cost of Humans' Habitual Performance. *Trends Neurosci*. 2019  
803 Jun;42(6):375-383.

804 Howe MW, Dombeck DA. Rapid signalling in distinct dopaminergic axons during locomotion  
805 and reward. *Nature*. 2016;535(7613):505-510. doi:10.1038/nature18942

806     Howe MW, Tierney PL, Sandberg SG, Phillips PE, Graybiel AM. Prolonged dopamine signalling  
807     in striatum signals proximity and value of distant rewards. *Nature*. 2013;500(7464):575-579

808     Jankovic J. Parkinson's disease: clinical features and diagnosis. *J Neurol Neurosurg Psychiatry*.  
809     2008 Apr;79(4):368-76.

810     Jaeger CB, Joh TH, Reis DJ. The effect of forebrain lesions in the neonatal rat: survival of  
811     midbrain dopaminergic neurons and the crossed nigrostriatal projection. *J Comp Neurol*.  
812     1983;218(1):74-90.

813     Jin X, Costa RM. Start/stop signals emerge in nigrostriatal circuits during sequence learning.  
814     *Nature*. 2010;466(7305):457-462.

815     Kang SY, Wasaka T, Shamim EA, Auh S, Ueki Y, Lopez GJ, Kida T, Jin SH, Dang N, Hallett M.  
816     Characteristics of the sequence effect in Parkinson's disease. *Mov Disord*. 2010 Oct  
817     15;25(13):2148-55.

818     Kitama T, Ohno T, Tanaka M, Tsubokawa H, Yoshida K. Stimulation of the caudate nucleus  
819     induces contraversive saccadic eye movements as well as head turning in the cat. *Neurosci Res*.  
820     1991 Oct;12(1):287-92.

821     Klaus A, Martins GJ, Paixao VB, Zhou P, Paninski L, Costa RM. The Spatiotemporal  
822     Organization of the Striatum Encodes Action Space. *Neuron*. 2017 Aug 30;95(5):1171-1180.e7.

823     Lahiri AK, Bevan MD. Dopaminergic Transmission Rapidly and Persistently Enhances  
824     Excitability of D1 Receptor-Expressing Striatal Projection Neurons. *Neuron*. 2020 Apr  
825     22;106(2):277-290.e6.

826     Lau B, Monteiro T, Paton JJ. The many worlds hypothesis of dopamine prediction error:  
827     implications of a parallel circuit architecture in the basal ganglia. *Curr Opin Neurobiol*.  
828     2017;46:241-247.

829     Lee RS, Mattar MG, Parker NF, Witten IB, Daw ND. Reward prediction error does not explain  
830     movement selectivity in DMS-projecting dopamine neurons. *Elife*. 2019;8:e42992.

831       Mazzoni, P., Hristova, A. & Krakauer, J. W. Why don't we move faster? Parkinson's disease,  
832       movement vigor, and implicit motivation. *J. Neurosci.* 27, 7105–7116 (2007).

833       Monje MHG, Sánchez-Ferro Á, Pineda-Pardo JA, Vela-Desojo L, Alonso-Frech F, Obeso JA.  
834       Motor Onset Topography and Progression in Parkinson's Disease: the Upper Limb Is First. *Mov*  
835       *Disord.* 2021 Jan 20.

836       Morrish PK, Sawle GV, Brooks DJ. Regional changes in [18F]dopa metabolism in the striatum  
837       in Parkinson's disease. *Brain.* 1996 Dec;119 ( Pt 6):2097-103.

838       Moss M, Zátka-Has P, Harris KD, Carandi M, Lak A. Dopamine axons to dorsal striatum  
839       encode contralateral stimuli and actions, 2020 (bioRxiv)

840       Niv Y, Daw ND, Joel D, Dayan P. Tonic dopamine: opportunity costs and the control of response  
841       vigor. *Psychopharmacology (Berl).* 2007;191(3):507-520.

842       Panigrahi B, Martin KA, Li Y, Graves AR, Vollmer A, Olson L, Mensh BD, Karpova AY, Dudman  
843       JT. Dopamine Is Required for the Neural Representation and Control of Movement Vigor. *Cell.*  
844       2015 Sep 10;162(6):1418-30.

845       Parker NF, Cameron CM, Taliaferro JP, Lee J, Choi JY, Davidson TJ, Daw ND, Witten IB.  
846       Reward and choice encoding in terminals of midbrain dopamine neurons depends on striatal  
847       target. *Nat Neurosci.* 2016 Jun;19(6):845-54.

848       Palmiter RD. Dopamine signaling in the dorsal striatum is essential for motivated behaviors:  
849       lessons from dopamine-deficient mice. *Ann N Y Acad Sci.* 2008;1129:35-46.

850       Poulin JF, Caronia G, Hofer C, et al. Mapping projections of molecularly defined dopamine  
851       neuron subtypes using intersectional genetic approaches. *Nat Neurosci.* 2018;21(9):1260-1271.

852       Romo R, Schultz W. Dopamine neurons of the monkey midbrain: contingencies of responses  
853       to active touch during self-initiated arm movements. *J Neurophysiol.* 1990;63(3):592-606.

854       Roggendorf J, Chen S, Baudrexel S, van de Loo S, Seifried C, Hilker R. Arm swing asymmetry  
855       in Parkinson's disease measured with ultrasound based motion analysis during treadmill gait. *Gait*  
856       *Posture.* 2012 Jan;35(1):116-20.

857 Saunders BT, Richard JM, Margolis EB, Janak PH. Dopamine neurons create Pavlovian  
858 conditioned stimuli with circuit-defined motivational properties. *Nat Neurosci.* 2018  
859 Aug;21(8):1072-1083.

860 Schultz W. Getting formal with dopamine and reward. *Neuron.* 2002;36(2):241-263.

861 Schultz, W., Ruffieux, A. & Aebischer, P. The activity of pars compacta neurons of the monkey  
862 substantia nigra in relation to motor activation. *Exp Brain Res* 51, 377–387 (1983).

863 Schwarcz R, Fuxe K, Agnati LF, Hökfelt T, Coyle JT. Rotational behaviour in rats with unilateral  
864 striatal kainic acid lesions: a behavioural model for studies on intact dopamine receptors. *Brain*  
865 *Res.* 1979 Jul 20;170(3):485-95.

866 Stott SR, Barker RA. Time course of dopamine neuron loss and glial response in the 6-OHDA  
867 striatal mouse model of Parkinson's disease. *Eur J Neurosci.* 2014 Mar;39(6):1042-56.

868 Shah VV, McNames J, Mancini M, Carlson-Kuhta P, Spain RI, Nutt JG, El-Gohary M, Curtze C,  
869 Horak FB. Quantity and quality of gait and turning in people with multiple sclerosis, Parkinson's  
870 disease and matched controls during daily living. *J Neurol.* 2020 Apr;267(4):1188-1196.

871 Tecuapetla F, Matias S, Dugue GP, Mainen ZF, Costa RM. Balanced activity in basal ganglia  
872 projection pathways is critical for contraversive movements. *Nat Commun.* 2014 Jul 8;5:4315.

873 Takahashi YK, Langdon AJ, Niv Y, Schoenbaum G. Temporal Specificity of Reward Prediction  
874 Errors Signaled by Putative Dopamine Neurons in Rat VTA Depends on Ventral Striatum. *Neuron.*  
875 2016;91(1):182-193.

876 Weintraub D, Simuni T, Caspell-Garcia C, et al. Cognitive performance and neuropsychiatric  
877 symptoms in early, untreated Parkinson's disease. *Mov Disord.* 2015;30(7):919-927.

878 Zhou P, Resendez SL, Rodriguez-Romaguera J, Jimenez JC, Neufeld SQ, Giovannucci A,  
879 Friedrich J, Pnevmatikakis EA, Stuber GD, Hen R, Kheirbek MA, Sabatini BL, Kass RE, Paninski  
880 L. Efficient and accurate extraction of in vivo calcium signals from microendoscopic video data.  
881 *Elife.* 2018 Feb 22;7:e28728.

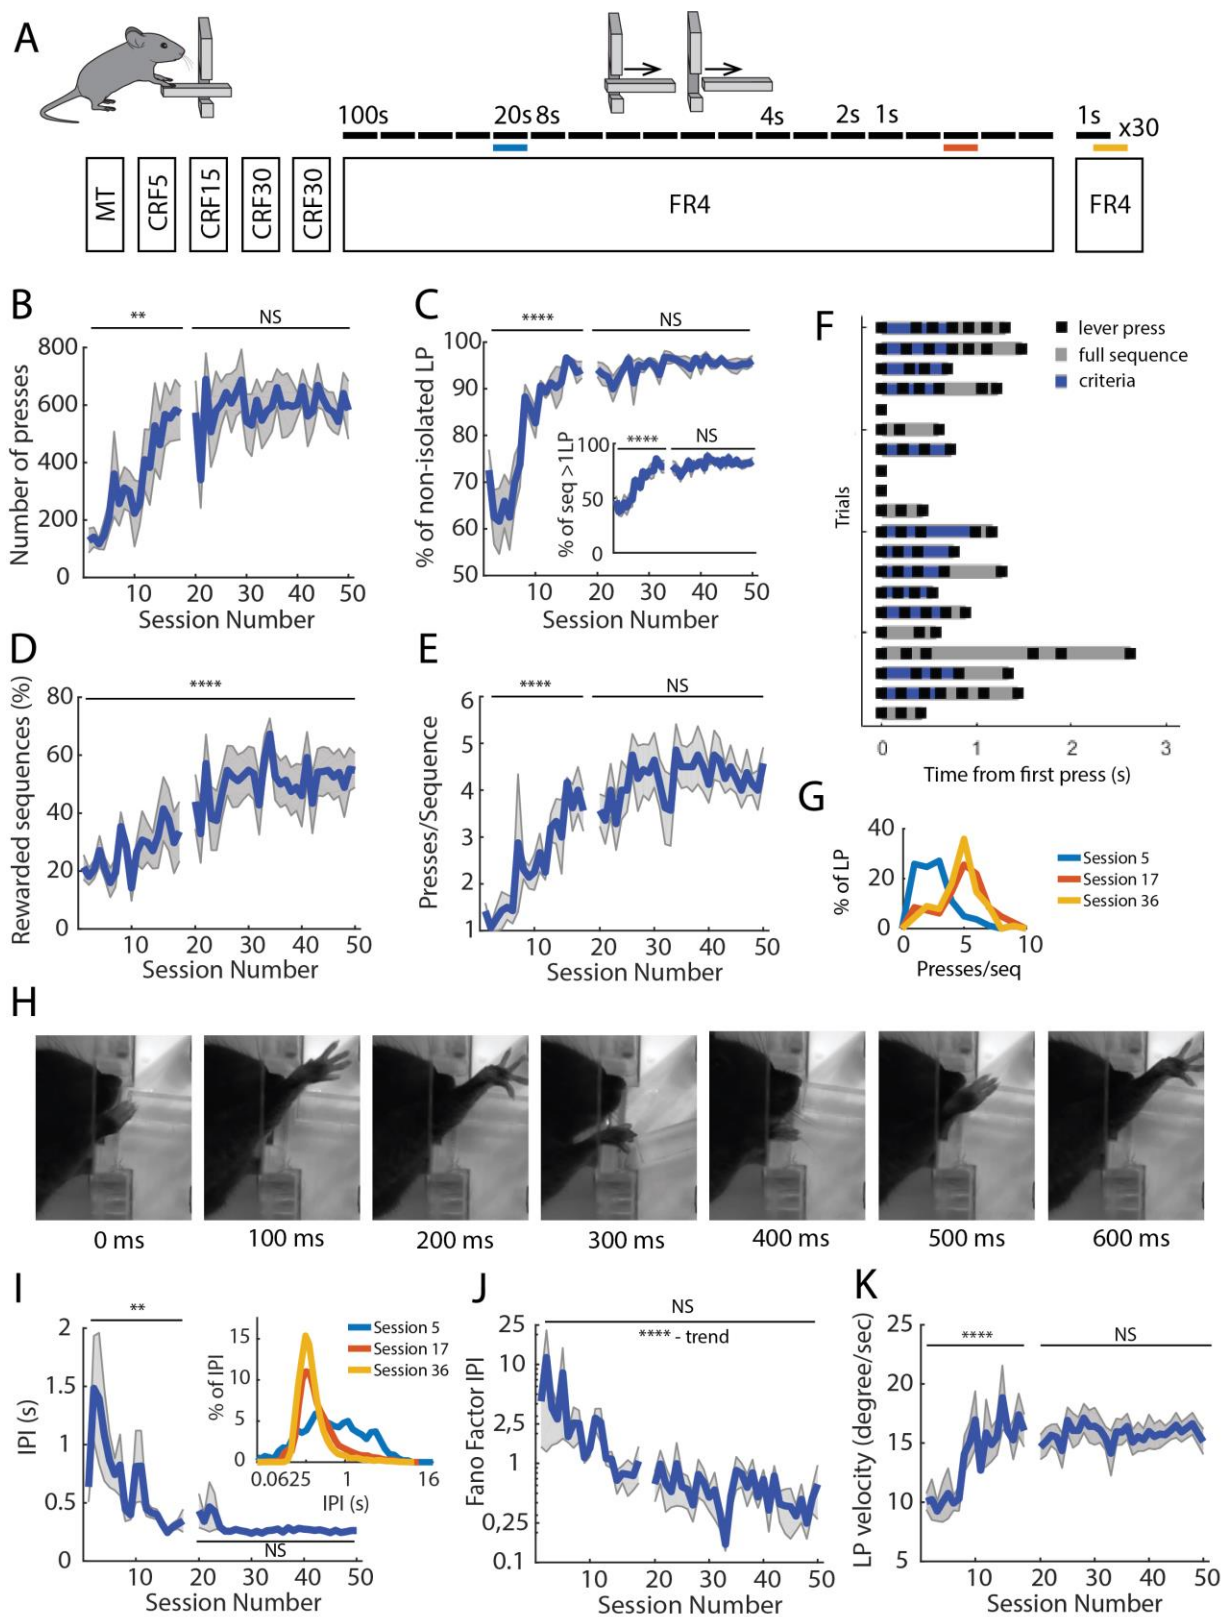

Figure 1



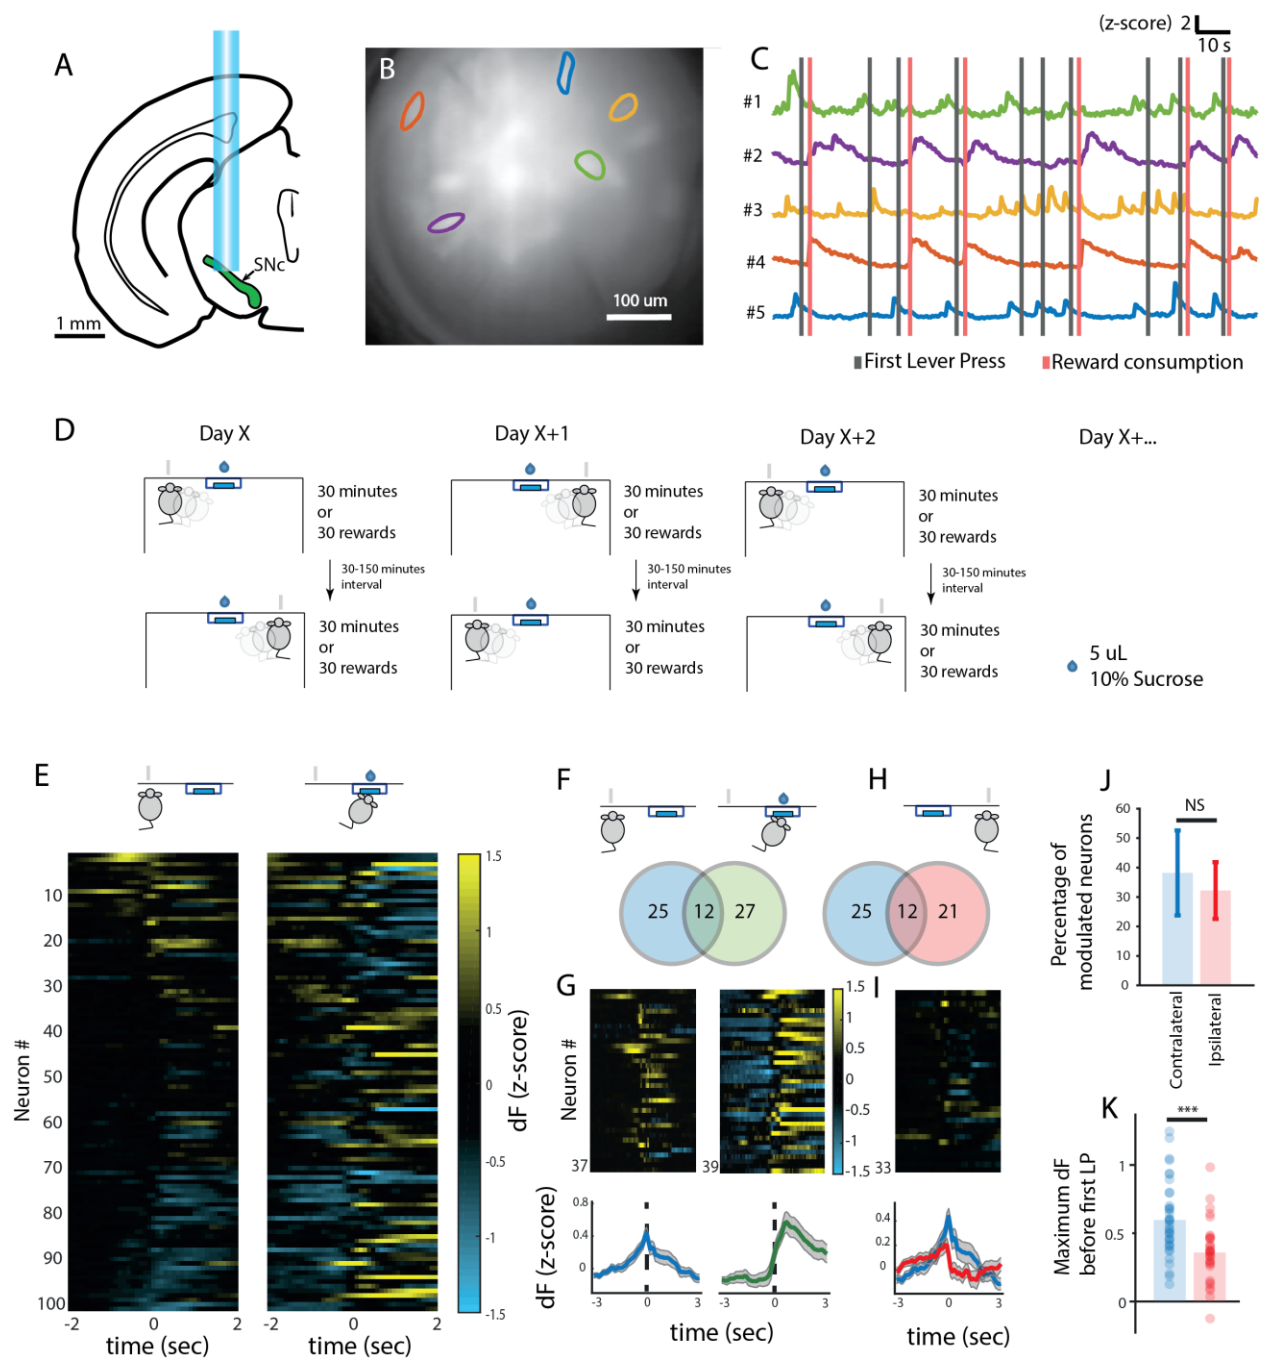

**Figure 2**

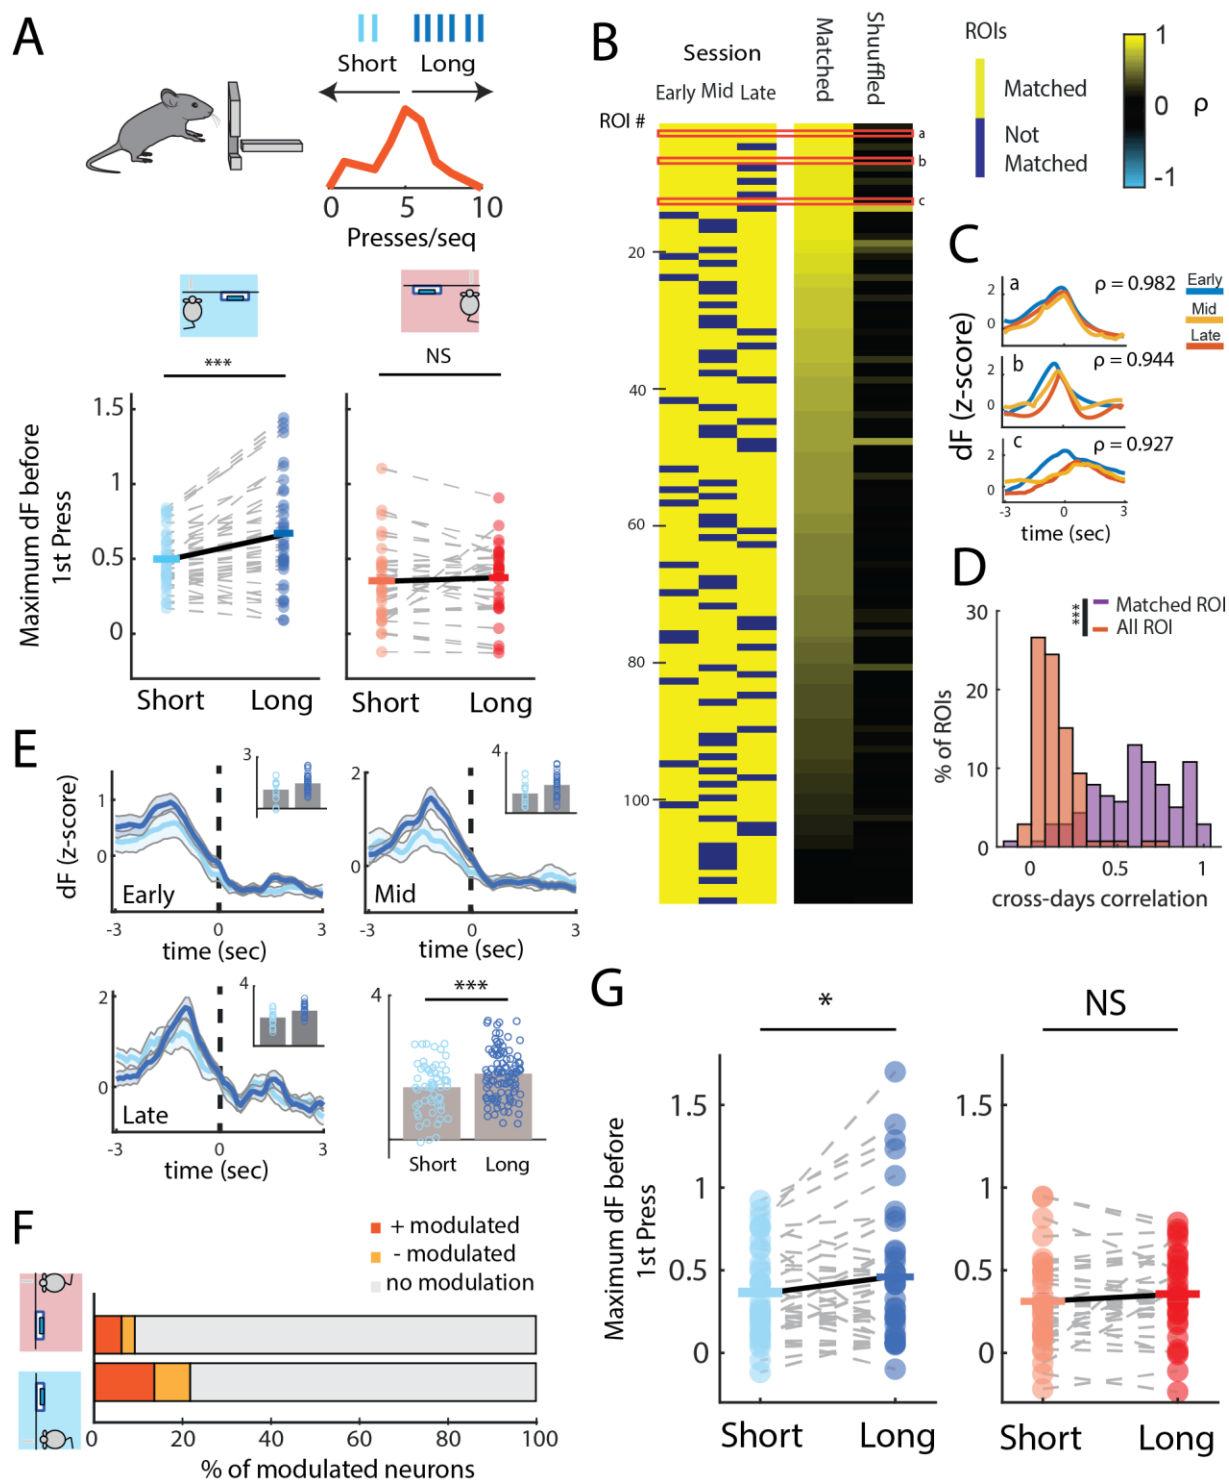

Figure 3



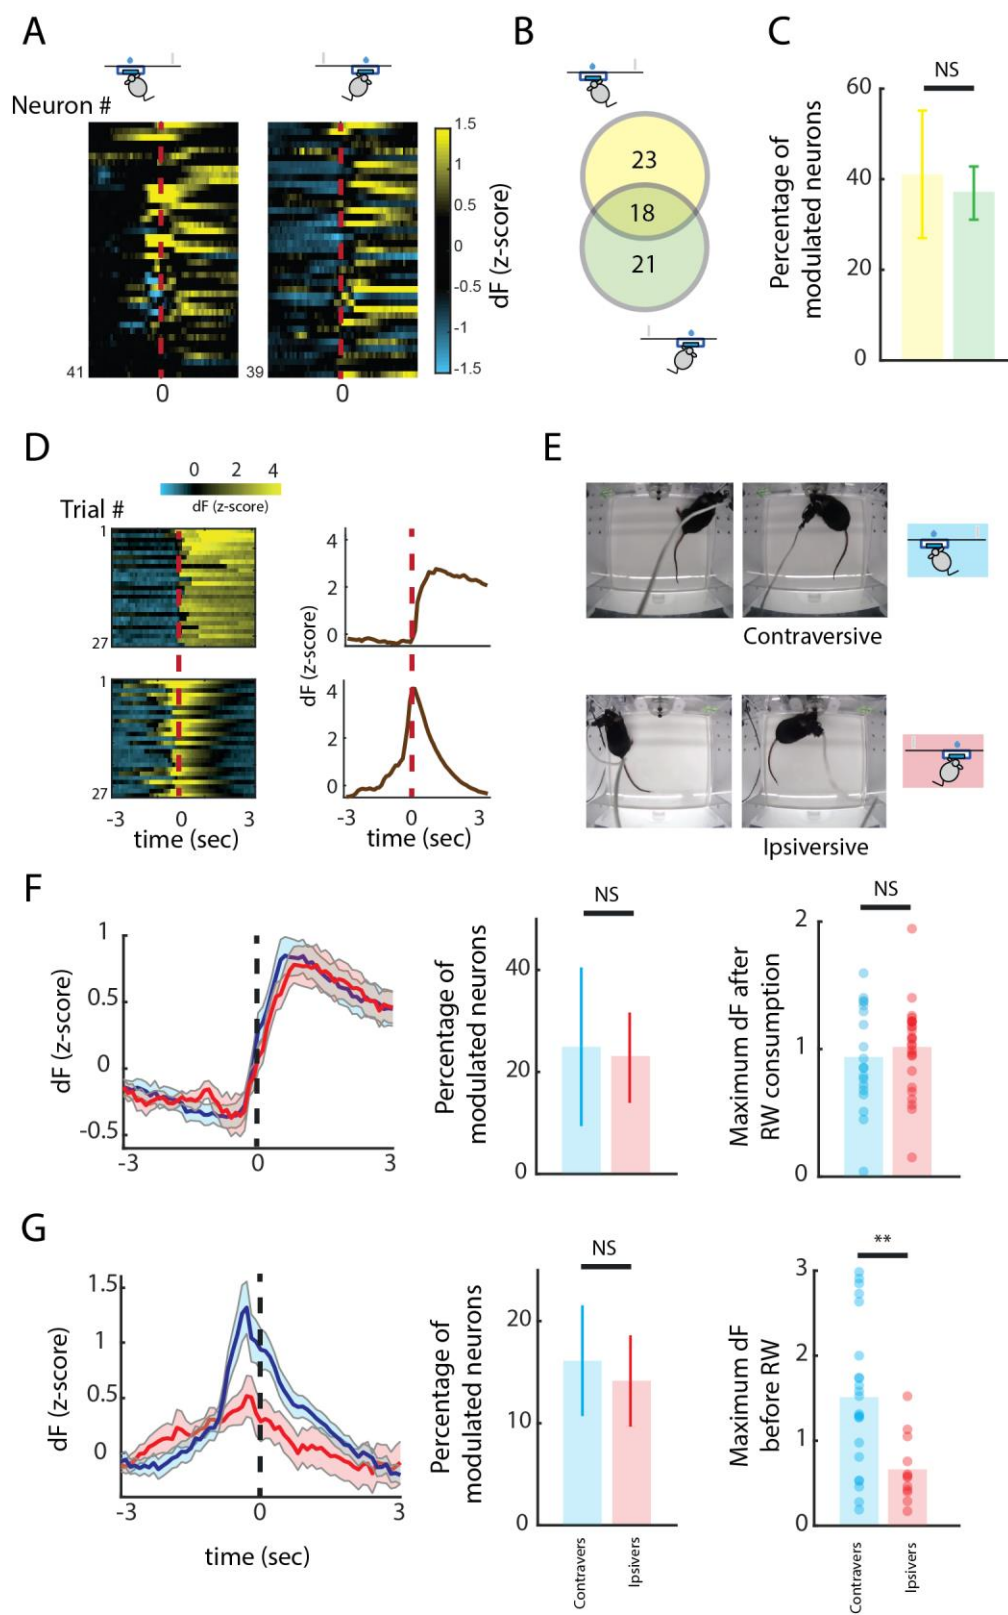

**Figure 4**

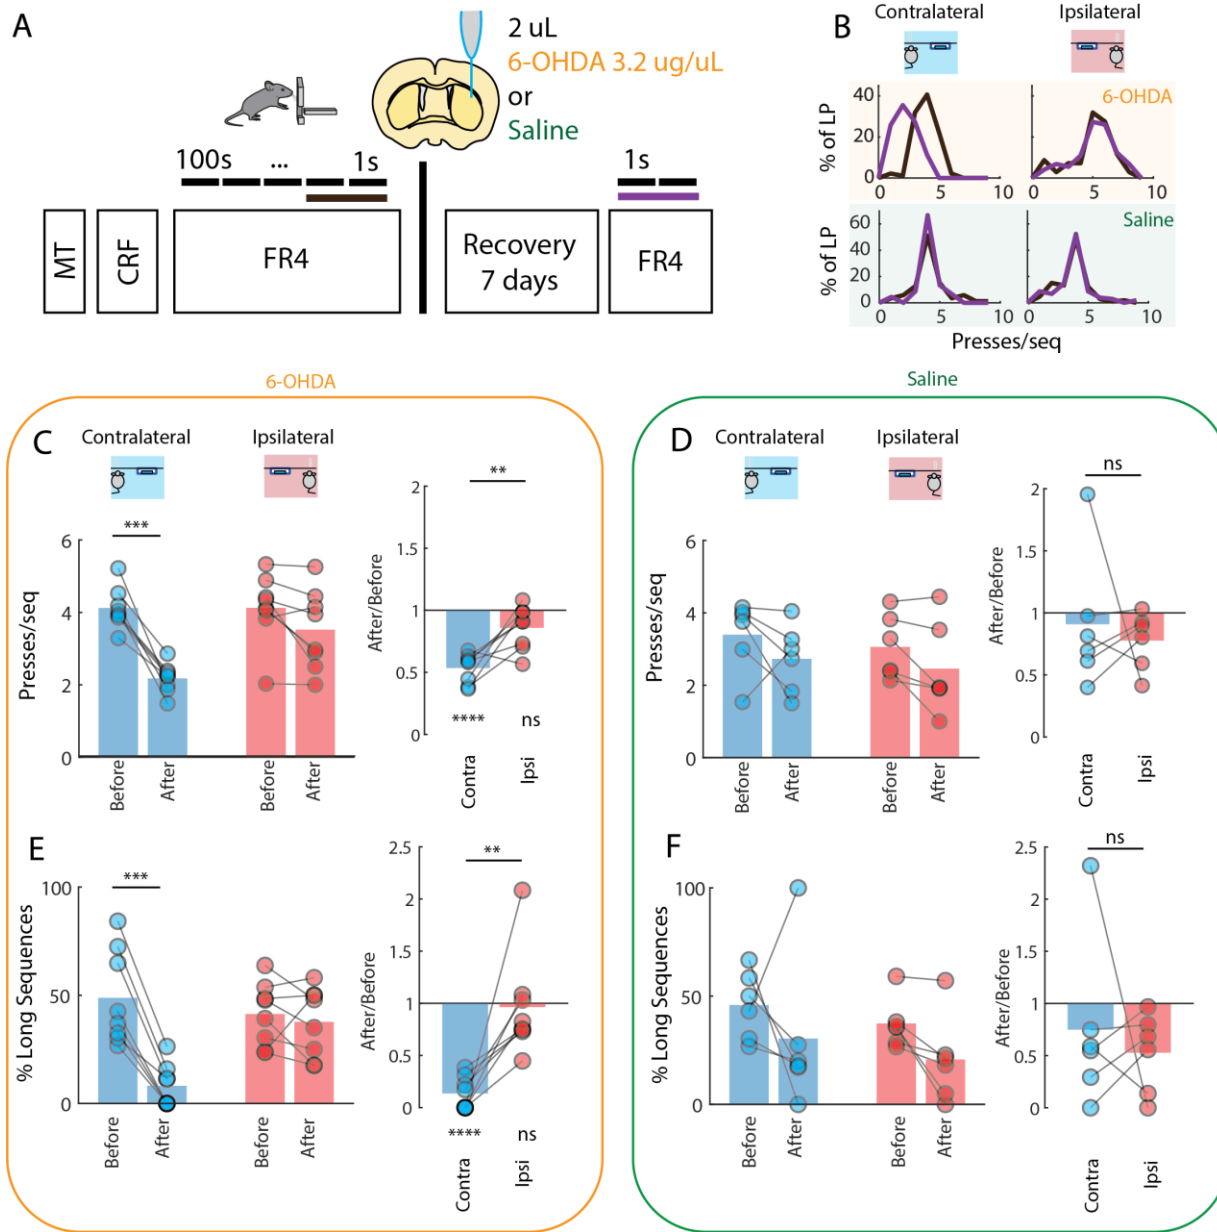

Figure 5
